# Supplementary material for: Development of an Improved Kinetic Model for CO2 Hydrogenation to Methanol
Source: MDPI journal article supplement (doi:10.3390/catal13101349), 2023-10-06
Supplement: s1 [file s1]

# Supplementary Information

Table S1. Graaf et al. original (Graaf et al., 1988) vs Fitted.

| Kinetic parameter | Original                                                                                              | Units                                                   | Estimated with CO in the feed                                                   | Units                    |
|-------------------|-------------------------------------------------------------------------------------------------------|---------------------------------------------------------|---------------------------------------------------------------------------------|--------------------------|
| $k_{CO}$          | $4.89 \times 10^7 \cdot \exp\left(\frac{-113000}{R \cdot T}\right)$                                   | $mol \cdot kg_{cat}^{-1} \cdot s^{-1} \cdot bar^{-1}$   | $8.15 \times 10^{-2} \cdot \exp\left(\frac{-20300}{R \cdot T}\right)$           | mol/h/g/bar <sup>2</sup> |
| $k_{CO_2}$        | $1.09 \times 10^5 \cdot \exp\left(\frac{-87500}{R \cdot T}\right)$                                    | $mol \cdot kg_{cat}^{-1} \cdot s^{-1} \cdot bar^{-1}$   | $4.66 \times 10^8 \cdot \exp\left(\frac{-111600}{R \cdot T}\right)$             | mol/h/g/bar <sup>2</sup> |
| $k_{RWGS}$        | $9.64 \times 10^{11} \cdot \exp\left(\frac{-152900}{R \cdot T}\right)$                                | $mol \cdot kg_{cat}^{-1} \cdot s^{-1} \cdot bar^{-0.5}$ | $1.29 \times 10^{16} \cdot \exp\left(\frac{-173019}{R \cdot T}\right)$          | mol/h/g/bar <sup>2</sup> |
| $K_{CO}$          | $2.16 \times 10^{-5} \cdot \exp\left(\frac{46800}{R \cdot T}\right)$                                  | bar <sup>-1</sup>                                       | -                                                                               | -                        |
| $K_{CO_2}$        | $7.05 \times 10^{-7} \cdot \exp\left(\frac{61700}{R \cdot T}\right)$                                  | bar <sup>-1</sup>                                       | -                                                                               | -                        |
|                   |                                                                                                       |                                                         | $K_{H_2O} = 1.5510$                                                             |                          |
|                   | $\frac{K_{H_2O}}{K_{H_2}^{0.5}} = 6.37 \times 10^{-9} \cdot \exp\left(\frac{84000}{R \cdot T}\right)$ | bar <sup>-0.5</sup>                                     | $K_{H_2} = 7.65 \times 10^9 \cdot \exp\left(\frac{-109626.2}{R \cdot T}\right)$ | bar <sup>-1</sup>        |

Table S2. Vanden Bussche and Froment original (van den Bussche & Froment, 1996) vs fitted.

| Kinetic parameter | Original                                                                               | Units                                                | Estimated with CO in the feed                                       | Units                    |
|-------------------|----------------------------------------------------------------------------------------|------------------------------------------------------|---------------------------------------------------------------------|--------------------------|
| $k_{CO_2}$        | $1.07 \times 10^{-10} \cdot \exp\left(\frac{36696}{R \cdot T}\right)$                  | $mol \cdot kg_{cat}^{-1} \cdot s^{-1} \cdot Pa^{-2}$ | $20.86 \cdot \exp\left(\frac{-23908.8}{R \cdot T}\right)$           | mol/h/g/bar <sup>2</sup> |
| $k_{RWGS}$        | $1.22 \times 10^5 \cdot \exp\left(\frac{-94765}{R \cdot T}\right)$                     | $mol \cdot kg_{cat}^{-1} \cdot s^{-1} \cdot Pa^{-1}$ | $6.8 \times 10^8 \cdot \exp\left(\frac{-94381.3}{R \cdot T}\right)$ | mol/h/g/bar <sup>2</sup> |
|                   | $\sqrt{K_{H_2}} = 1.578 \times 10^{-3} \cdot \exp\left(\frac{17197}{R \cdot T}\right)$ | Pa <sup>-0.5</sup>                                   | $K_{H_2} = 1.41 \cdot \exp\left(\frac{-2689.8}{R \cdot T}\right)$   | bar <sup>-1</sup>        |
| $K_{H_2O}$        | $6.62 \times 10^{-16} \cdot \exp\left(\frac{124119}{R \cdot T}\right)$                 | Pa <sup>-1</sup>                                     | $1.20 \cdot \exp\left(\frac{-5435.5}{R \cdot T}\right)$             | bar <sup>-1</sup>        |
|                   | $\frac{K_{H_2O}}{K_8 K_9 K_{H_2}} = 3.45338$                                           | -                                                    | $K_8 K_9 = 30.03 \cdot \exp\left(\frac{-8959.6}{R \cdot T}\right)$  | -                        |

**Table S3.** Slotboom et al original 6 parameter model (Slotboom et al., 2020) vs fitted.

| Kinetic parameter | Original                                                                | Units                                                 | Estimated with CO in the feed                                          | Units                    |
|-------------------|-------------------------------------------------------------------------|-------------------------------------------------------|------------------------------------------------------------------------|--------------------------|
| $k_{CO_2}$        | $7.414 \times 10^{14} \cdot \exp\left(\frac{-166000}{R \cdot T}\right)$ | $mol \cdot kg_{cat}^{-1} \cdot s^{-1} \cdot bar^{-1}$ | $2.19 \times 10^2 \cdot \exp\left(\frac{-43921.4}{R \cdot T}\right)$   | mol/h/g/bar <sup>2</sup> |
| $k_{RWGS}$        | $1.111 \times 10^{19} \cdot \exp\left(\frac{-203700}{R \cdot T}\right)$ | $mol \cdot kg_{cat}^{-1} \cdot s^{-1} \cdot bar^{-1}$ | $2.75 \times 10^{10} \cdot \exp\left(\frac{-110563}{R \cdot T}\right)$ | mol/h/g/bar <sup>2</sup> |
| $K_{H_2}$         | 1.099                                                                   | bar <sup>-0.5</sup>                                   | 13.62                                                                  | bar <sup>-0.5</sup>      |
| $K_{H_2O/9}$      | 126.4                                                                   | bar <sup>-1</sup>                                     | 41.55                                                                  | bar <sup>-1</sup>        |

**Table S4.** Seidel et al original (Seidel et al., 2018; Seidel et al., 2020) vs fitted.

| Kinetic parameter                       | Original                                                                | Units                                                 | Estimated with CO in the feed                                                 | Units                    |
|-----------------------------------------|-------------------------------------------------------------------------|-------------------------------------------------------|-------------------------------------------------------------------------------|--------------------------|
| $\Delta G_1$                            | -1134.8                                                                 | J/mol                                                 | -                                                                             | -                        |
| $\Delta G_2$                            | -769.3                                                                  | J/mol                                                 | -                                                                             | -                        |
| $\Delta G_3$                            | -365.5                                                                  | J/mol                                                 | -                                                                             | -                        |
| $k_{CO}$                                | $3.074 \times 10^{12} \cdot \exp\left(\frac{-154400}{R \cdot T}\right)$ | $mol \cdot kg_{cat}^{-1} \cdot s^{-1} \cdot bar^{-1}$ | $1.99 \times 10^{-2} \cdot \exp\left(\frac{-12024.4}{R \cdot T}\right)$       | mol/h/g/bar <sup>2</sup> |
| $k_{CO_2}$                              | $4.613 \times 10^7 \cdot \exp\left(\frac{-96820}{R \cdot T}\right)$     | $mol \cdot kg_{cat}^{-1} \cdot s^{-1} \cdot bar^{-1}$ | $9.14 \cdot \exp\left(\frac{-5406.3}{R \cdot T}\right)$                       | mol/h/g/bar <sup>2</sup> |
| $k_{RWGS}$                              | $6.107 \times 10^{13} \cdot \exp\left(\frac{-161000}{R \cdot T}\right)$ | $mol \cdot kg_{cat}^{-1} \cdot s^{-1} \cdot bar^{-1}$ | $1.56 \times 10^6 \cdot \exp\left(\frac{-76382}{R \cdot T}\right)$            | mol/h/g/bar <sup>2</sup> |
| $K_{CO}$                                | 0.1470                                                                  | bar <sup>-1</sup>                                     | $1.87 \times 10^{33} \cdot \exp\left(\frac{-309237.6}{R \cdot T}\right)$      | bar <sup>-1</sup>        |
| $K_{CH_3OH}^{\ominus}$                  | 0                                                                       | -                                                     | 0                                                                             | -                        |
| $K_{CO_2}^{\ominus}$                    | 0                                                                       | -                                                     | 0                                                                             | -                        |
| $\frac{K_{H_2O}K_O}{K_{H_2}} = 34.9226$ |                                                                         | -                                                     | $K_O = 1.79 \times 10^{-1} \cdot \exp\left(\frac{-5000.9}{R \cdot T}\right)$  | -                        |
| $K_{CO_2}$                              | 0.04712                                                                 | bar <sup>-1</sup>                                     | 0                                                                             | -                        |
| $K_{CH_3OH}^*$                          | 0                                                                       | -                                                     | 0                                                                             | -                        |
| $K_{H_2O}$                              | 0.0297                                                                  | bar <sup>-1</sup>                                     | $2.34 \cdot \exp\left(\frac{-10922.9}{R \cdot T}\right)$                      | bar <sup>-1</sup>        |
|                                         | $\sqrt{K_{H_2}} = 1.1665$                                               | bar <sup>-0.5</sup>                                   | $K_{H_2} = 1.96 \times 10^1 \cdot \exp\left(\frac{-4086.1}{R \cdot T}\right)$ | bar <sup>-0.5</sup>      |

**Table S5.** MOD parameters.

| Kinetic parameter      | Estimated with CO in the feed                                        | Units                    |
|------------------------|----------------------------------------------------------------------|--------------------------|
| $\Delta G_1$           | -                                                                    | -                        |
| $\Delta G_2$           | -                                                                    | -                        |
| $\Delta G_3$           | -                                                                    | -                        |
| $k_{CO_2}$             | $3.77 \times 10^2 \cdot \exp\left(\frac{-25000}{R \cdot T}\right)$   | mol/h/g/bar <sup>2</sup> |
| $k_{RWGS}$             | $3.60 \times 10^8 \cdot \exp\left(\frac{-98200}{R \cdot T}\right)$   | mol/h/g/bar <sup>2</sup> |
| $K_{CO}$               | $1.87 \times 10^7 \cdot \exp\left(\frac{-68434.8}{R \cdot T}\right)$ | bar <sup>-1</sup>        |
| $K_{CH_3OH}^{\ominus}$ | 0                                                                    | -                        |
| $K_{CO_2}^{\ominus}$   | 0                                                                    | -                        |
| $K_O$                  | 178.17                                                               | -                        |
| $K_{CO_2}$             | 0                                                                    | -                        |
| $K_{CH_3OH}^*$         | 0                                                                    | -                        |
| $K_{H_2O}$             | 0.0581                                                               | bar <sup>-1</sup>        |
| $K_{H_2}$              | 3.786                                                                | bar <sup>-0.5</sup>      |

**Table S6.** Plug flow calculation, this follows the criteria discussed in reference (Ertl et al., 1997; Delgado, 2006).

| Geometrical Characteristics |      |               |       |
|-----------------------------|------|---------------|-------|
| $d_t$ (mm)                  | 10.1 | $d_t/d_p$     | 107.4 |
| $h_{bed}$ (mm)              | 3.82 | $h_{bed}/d_p$ | 40.7  |
| $d_p$ ( $\mu$ m)            | 94   |               |       |

## References

- Delgado, J.M.P.Q., 2006. A critical review of dispersion in packed beds. *Heat Mass Transfer* **42**, 279–310. <https://doi.org/10.1007/s00231-005-0019-0>.
- Ertl, G., Knözinger, H., Weitkamp, J., 1997, editors. Handbook of heterogeneous catalysis. Wiley-VCH; New York.
- Graaf, G.H., Stamhuis, E.J., Beenackers, A.A., 1988. Kinetics of low-pressure methanol synthesis. *Chemical Engineering Science*, **43**(12), 3185-3195. [https://doi.org/10.1016/0009-2509\(88\)85127-3](https://doi.org/10.1016/0009-2509(88)85127-3).
- Slotboom, Y., Bos, M.J., Pieper, J., Vrieswijk, V., Likozar, B., Kersten, S.R., Brilman, D.W., 2020. Critical assessment of steady-state kinetic models for the synthesis of methanol over an industrial Cu/ZnO/Al<sub>2</sub>O<sub>3</sub> catalyst, *Chem. Eng. J.* **389**, 124181, <https://doi.org/10.1016/j.cej.2020.124181>.
- Seidel, C., Jörke, A., Vollbrecht, B., Seidel-Morgenstern, A., Kienle, A., 2018. Kinetic modeling of methanol synthesis from renewable resources, *Chem. Eng. Sci.* **175**, 130–138. <https://doi.org/10.1016/j.ces.2017.09.043>.
- Seidel, C., Jörke, A., Vollbrecht, B., Seidel-Morgenstern, A., Kienle, A., 2020. Corrigendum to 'Kinetic modeling of methanol synthesis from renewable resources' (*Chem. Eng. Sci.* **175** (2018) 130–138). *Chem. Eng. Sci.* **223**, 115724. <https://doi.org/10.1016/j.ces.2020.115724>.
- van den Bussche, K.M., Froment, G.F., 1996. A steady-state kinetic model for methanol synthesis and the water gas shift reaction on a commercial Cu/ZnO/Al<sub>2</sub>O<sub>3</sub> catalyst, *J. Catal.* **161** (1), 1–10. <https://doi.org/10.1006/jcat.1996.0156>.
